# Supplementary material
Source: Copernicus journal article supplement (doi:10.5194/egusphere-2026-1855)
Supplement: Supplementary file 1 [file egusphere-2026-1855-supplement.pdf]

Supporting information for

**Quantitative insights into regime-dependent aerosol pH variability in an ammonia-rich urban atmosphere from explainable machine learning**

Jing Duan<sup>1,†</sup>, Ting Wang<sup>1,†</sup>, Ru-Jin Huang<sup>1,2,3\*</sup>, Jingye Ren<sup>1</sup>, Haobin Zhong<sup>4</sup>, Wei Xu<sup>5</sup>, Chunshui Lin<sup>1</sup>, Yanan Zhan<sup>1,2</sup>, Huabin Huang<sup>6</sup>, Yongjie Li<sup>7</sup>

<sup>1</sup>State Key Laboratory of Loess Science, Institute of Earth Environment, Chinese Academy of Sciences, Xi'an 710061, China

<sup>2</sup>Institute of Global Environmental Change, Xi'an Jiaotong University, Xi'an 710049, China

<sup>3</sup>University of Chinese Academy of Sciences, Beijing 100049, China

<sup>4</sup>School of Advanced Materials Engineering, Jiaying Nanhu University, Jiaying, 314001, China

<sup>5</sup>State Key Laboratory of Advanced Environmental Technology, Institute of Urban Environment, Chinese Academy of Sciences, Xiamen, China

<sup>6</sup>College of Environment and Public Health, Xiamen Huaxia University, Xiamen 361024, China

<sup>7</sup>Department of Civil and Environmental Engineering, Faculty of Science and Technology, University of Macau, Taipa, Macau SAR 999078, China

Correspondence to: Ru-Jin Huang (rujin.huang@ieecas.cn)

†Contributed equally to this study

### **Text S1. Sampling and instrumentation**

The field campaign was carried out at an urban site located on the rooftop of a five-story building (~20 m above ground) at the National Center for Nanoscience in Beijing (39.99°N, 116.32°E). The site is situated near the 4th Ring Road and is influenced by mixed residential, commercial, and traffic emissions (Duan et al., 2020; Gu et al., 2020). Continuous measurements were performed from 21 December 2014 to 31 December 2015.

Non-refractory PM<sub>1</sub> (NR-PM<sub>1</sub>) species, including organics (OA), sulfate (SO<sub>4</sub><sup>2-</sup>), nitrate (NO<sub>3</sub><sup>-</sup>), ammonium (NH<sub>4</sub><sup>+</sup>), and chloride (Cl<sup>-</sup>), were quantified using an Aerodyne quadrupole aerosol chemical speciation monitor (Q-ACSM) with a time resolution of ~30 min (Ng et al., 2011). Ambient aerosols were sampled through a 3/8 in. stainless-steel tube at a flow rate of ~ 3 L min<sup>-1</sup>, and the coarse particles were removed by an University Research Glassware (URG) cyclone (model: URG2000-30ED) with a 2.5 μm cut in front of the sampling inlet. Before entering the ACSM, particles were dried using a Nafion dryer (MD110-48S; Perma Pure, Inc., Lakewood, NJ, USA). The dried submicron aerosol was then subsampled into the ACSM at 85 cc min<sup>-1</sup>, controlled by a 100 μm critical orifice. Within the ACSM, particles were focused into a narrow beam by an aerodynamic lens and vaporized on a heated surface (~600 °C). The resulting vapor was ionized with electron impact and chemically characterized with a quadrupole mass spectrometer. Instrument calibration was carried out using monodisperse 300 nm ammonium nitrate particles generated by an atomizer (Model 9302, TSI Inc., Shoreview, MN, USA) and size-selected by a differential mobility analyzer (DMA; TSI Model 3080) to determine the response factor (RF) and ionization efficiency (IE) (Ng et al., 2011).

Ambient ammonia (NH<sub>3</sub>) concentrations were measured using a Picarro G2103 analyzer (Picarro Inc., USA), which employs wavelength-scanning optical cavity ring down spectroscopy (WS-CRDS). This technique is capable of measuring NH<sub>3</sub> with a parts-per-trillion (ppt) sensitivity based on a sophisticated time-based measurement system (Maasikmets et al., 2015). The G2103 is equipped with high-precision temperature and pressure control systems to ensure the highest accuracy and lowest drift. In addition, the G2103 offers a large dynamic range, providing linear response into the parts-per-million (ppm) range without dilution,

concentration and sample preparation.

Meteorological parameters, including temperature and relative humidity (RH), were simultaneously recorded by an automatic weather station (MAWS201, Vaisala, Vantaa, Finland).

### Text S2. Calculation of excess NH<sub>x</sub>

Excess NH<sub>x</sub> in this study represents the portion of total NH<sub>x</sub> (gas-phase NH<sub>3</sub> plus particle-phase NH<sub>4</sub><sup>+</sup>) that remains after neutralizing the major inorganic acidic species (SO<sub>4</sub><sup>2-</sup>, NO<sub>3</sub><sup>-</sup>, and Cl<sup>-</sup>) in the aerosol (i.e., the required NH<sub>x</sub>) (Liu et al., 2017).

Thus, excess NH<sub>x</sub> is defined as:

$$\text{Excess NH}_x = \text{Total NH}_x - \text{Required NH}_x$$

Where

$$\text{Total NH}_x = 17 \times \left( \frac{[\text{NH}_3]}{17} + \frac{[\text{NH}_4^+]}{18} \right) \quad (1)$$

$$\text{Required NH}_x = 17 \times \left( \frac{[\text{SO}_4^{2-}]}{48} + \frac{[\text{NO}_3^-]}{62} + \frac{[\text{Cl}^-]}{35.5} \right) \quad (2)$$

[NH<sub>3</sub>], [NH<sub>4</sub><sup>+</sup>], [SO<sub>4</sub><sup>2-</sup>], [NO<sub>3</sub><sup>-</sup>], and [Cl<sup>-</sup>] are the measured mass concentrations (μg m<sup>-3</sup>). A positive excess NH<sub>x</sub> (μg m<sup>-3</sup>) indicates ammonia-rich conditions, whereas a negative value denotes ammonia-poor conditions (Song et al., 2018).

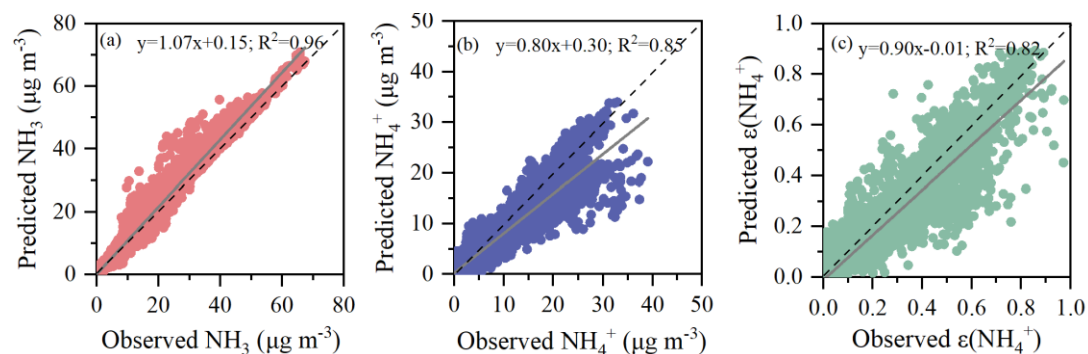

**Figure S1.** Comparisons between predicted and observed values for NH<sub>3</sub> (a), NH<sub>4</sub><sup>+</sup> (b), and ε(NH<sub>4</sub><sup>+</sup>) (c). ε(NH<sub>4</sub><sup>+</sup>) is calculated as the molar ratio of NH<sub>4</sub><sup>+</sup>/(NH<sub>4</sub><sup>+</sup>+NH<sub>3</sub>).

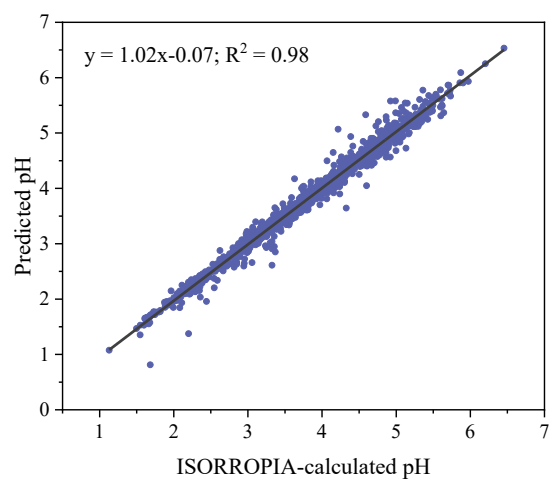

**Figure S2.** Correlation between aerosol pH predicted by XGBoost model and pH calculated using ISORROPIA II.

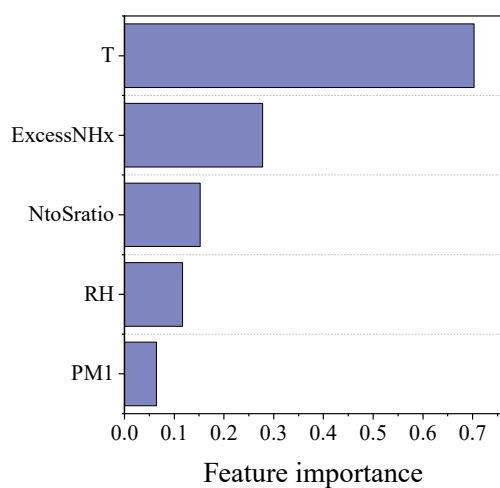

**Figure S3.** Feature importance for aerosol pH over the entire sampling period based on mean absolute SHAP values, showing the relative influence of each predictor on the model output.

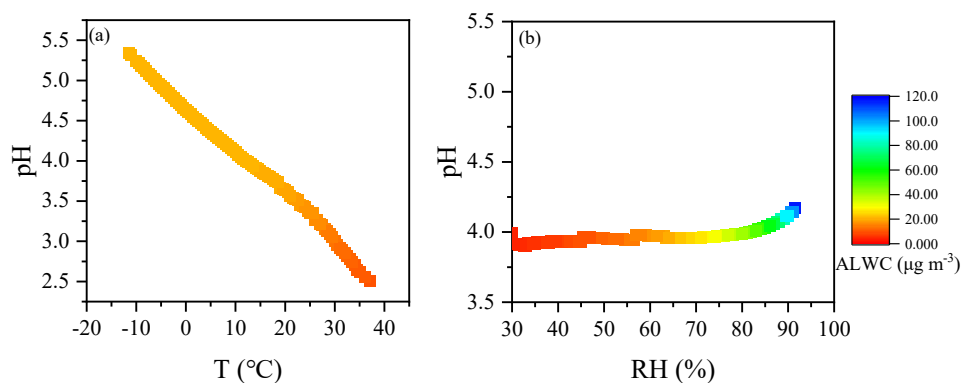

**Figure S4.** ISORROPIA II sensitivity tests of pH to temperature (a) and RH (b). In this analysis, the real-time measured values of the tested variable, while the average values of the other species were applied as the input into ISORROPIA II.

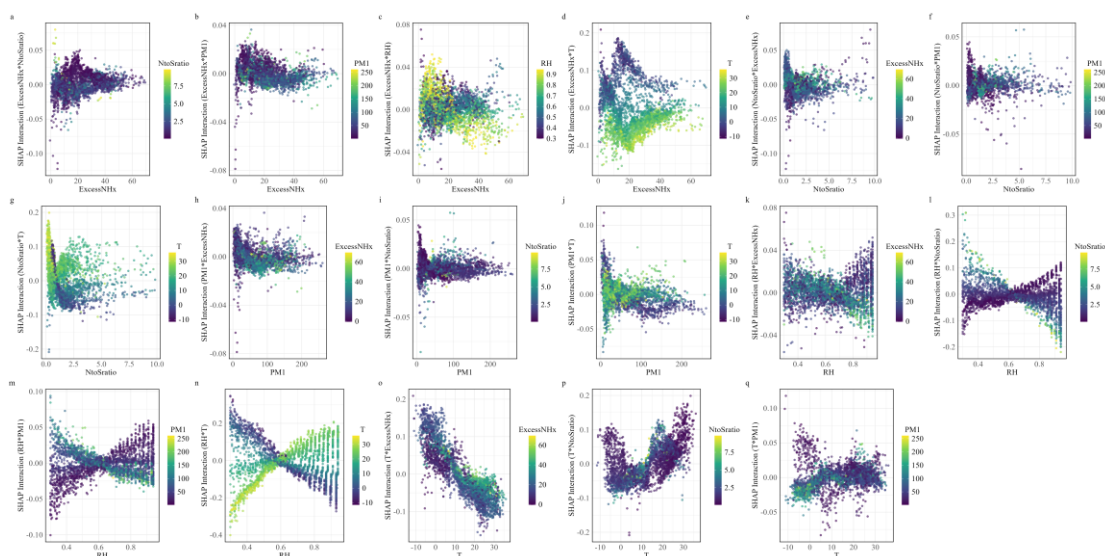

**Figure S5.** Summary plots of the SHAP interaction matrix values for pH among each pair of variables, excluding RH vs T, RH vs N/S ratio, and RH vs PM<sub>1</sub> mass, which are discussed in detail in the manuscript.

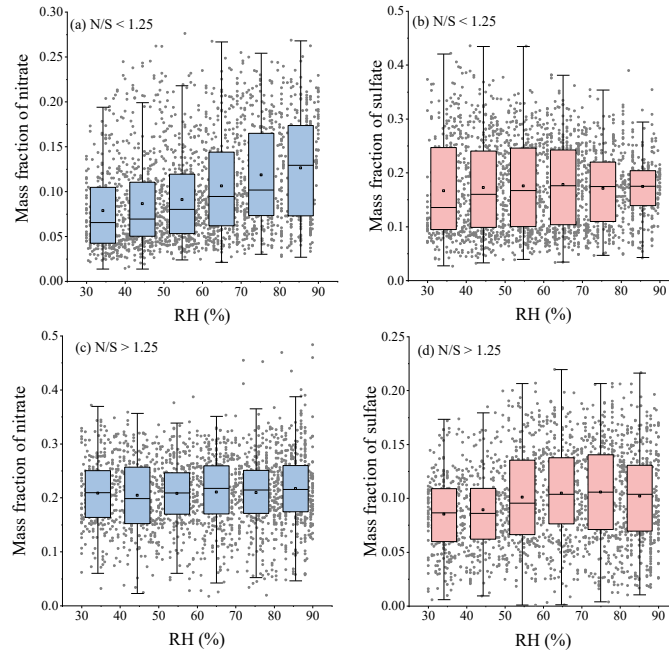

**Figure S6.** The variations in nitrate and sulfate mass fractions with RH under sulfate-dominant conditions ( $N/S < 1.25$ ) (a, b) and nitrate-dominant conditions ( $N/S > 1.25$ ) (c, d), respectively. The whiskers, floating boxes, lines, and squares inside the boxes denote the 10th and 90th distributions, 25th-75th ranges, median values, and mean values, respectively.

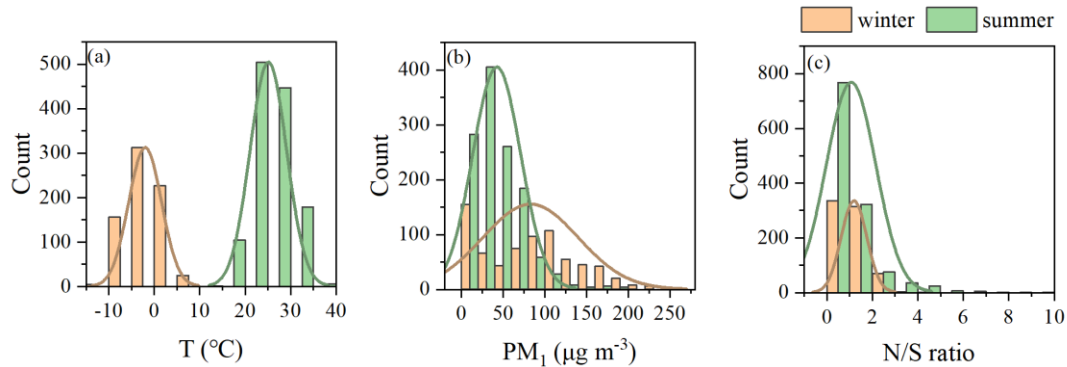

**Figure S7.** The distribution of temperature (a),  $PM_1$  mass loading (b), and nitrate-to-sulfate (N/S) mass ratio (c) between summer and winter periods.

## Reference

Duan, J., Huang, R.-J., Li, Y., Chen, Q., Zheng, Y., Chen, Y., Lin, C., Ni, H., Wang, M.,  
 Ovadnevaite, J., Ceburnis, D., Chen, C., Worsnop, D. R., Hoffmann, T., O'Dowd, C., and

- Cao, J.: Summertime and wintertime atmospheric processes of secondary aerosol in Beijing, *Atmos. Chem. Phys.*, 20, 3793-3807, 10.5194/acp-20-3793-2020, 2020.
- Gu, Y., Huang, R. J., Li, Y., Duan, J., Chen, Q., Hu, W., Zheng, Y., Lin, C., Ni, H., Dai, W., Cao, J., Liu, Q., Chen, Y., Chen, C., Ovadnevaite, J., Ceburnis, D., and O'Dowd, C.: Chemical nature and sources of fine particles in urban Beijing: Seasonality and formation mechanisms, *Environ. Int.*, 140, 105732, 10.1016/j.envint.2020.105732, 2020.
- Liu, M., Song, Y., Zhou, T., Xu, Z., Yan, C., Zheng, M., Wu, Z., Hu, M., Wu, Y., and Zhu, T.: Fine particle pH during severe haze episodes in northern China, *Geophys. Res. Lett.*, 44, 5213-5221, 10.1002/2017gl073210, 2017.
- Maasikmets, M., Teinemaa, E., Kaasik, A., and Kimmel, V.: Measurement and analysis of ammonia, hydrogen sulphide and odour emissions from the cattle farming in Estonia, *Biosyst. Eng.*, 139, 48-59, 10.1016/j.biosystemseng.2015.08.002, 2015.
- Ng, N. L., Herndon, S. C., Trimborn, A., Canagaratna, M. R., Croteau, P. L., Onasch, T. B., Sueper, D., Worsnop, D. R., Zhang, Q., Sun, Y. L., and Jayne, J. T.: An Aerosol Chemical Speciation Monitor (ACSM) for Routine Monitoring of the Composition and Mass Concentrations of Ambient Aerosol, *Aerosol. Sci. Tech.*, 45, 780-794, 10.1080/02786826.2011.560211, 2011.
- Song, S., Gao, M., Xu, W., Shao, J., Shi, G., Wang, S., Wang, Y., Sun, Y., and McElroy, M. B.: Fine-particle pH for Beijing winter haze as inferred from different thermodynamic equilibrium models, *Atmos. Chem. Phys.*, 18, 7423-7438, 10.5194/acp-18-7423-2018, 2018.
